# Supplementary material for: A series of novel host materials based on the 10,11-dihydro-5H-dibenzo[b,f]azepine unit for highly efficient green and red organic light-emitting diodes
Source: Royal Society of Chemistry journal article supplement (doi:10.1039/d0tc05457g), 2021-01-01
Supplement: d0tc05457g1.pdf [file d0tc05457g1.pdf]

***Supporting information:***

A series of novel host materials based on 10,11-dihydro-5*H*-dibenzo[*b,f*]azepine unit for highly efficient green and red organic light-emitting diodes

Bangjin Sun,<sup>†</sup> Kai-Ning Tong,<sup>†</sup> Sheng-Nan Liu, Man-Keung Fung\* and Jian Fan,\*

*Institute of Functional Nano & Soft Materials (FUNSOM), Jiangsu Key Laboratory for Carbon-Based Functional Materials & Devices, Soochow University, Suzhou, Jiangsu 215123, China*

E-mail: mkfung@suda.edu.cn; jianfan@suda.edu.cn

<sup>†</sup>These authors contribute equally to this work.

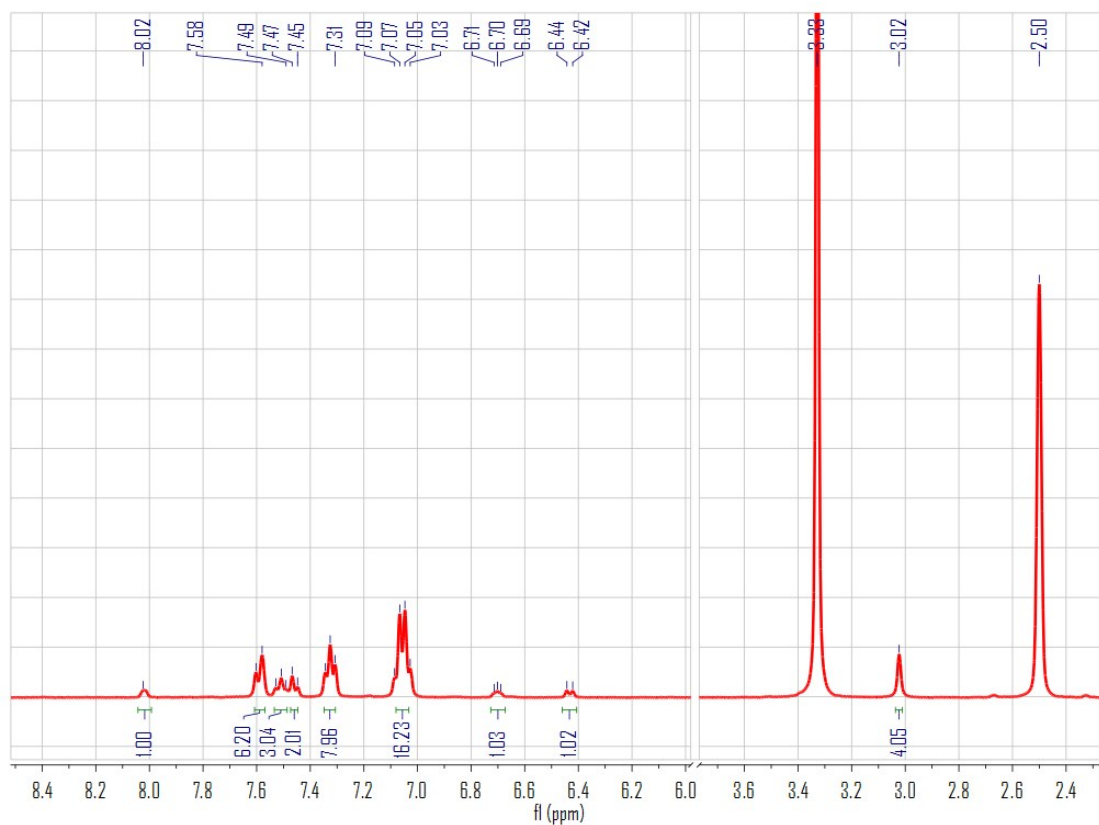

Fig. S1.  $^1\text{H}$  NMR spectrum of **D-PY** ( $\text{DMSO-}d_6$ ).

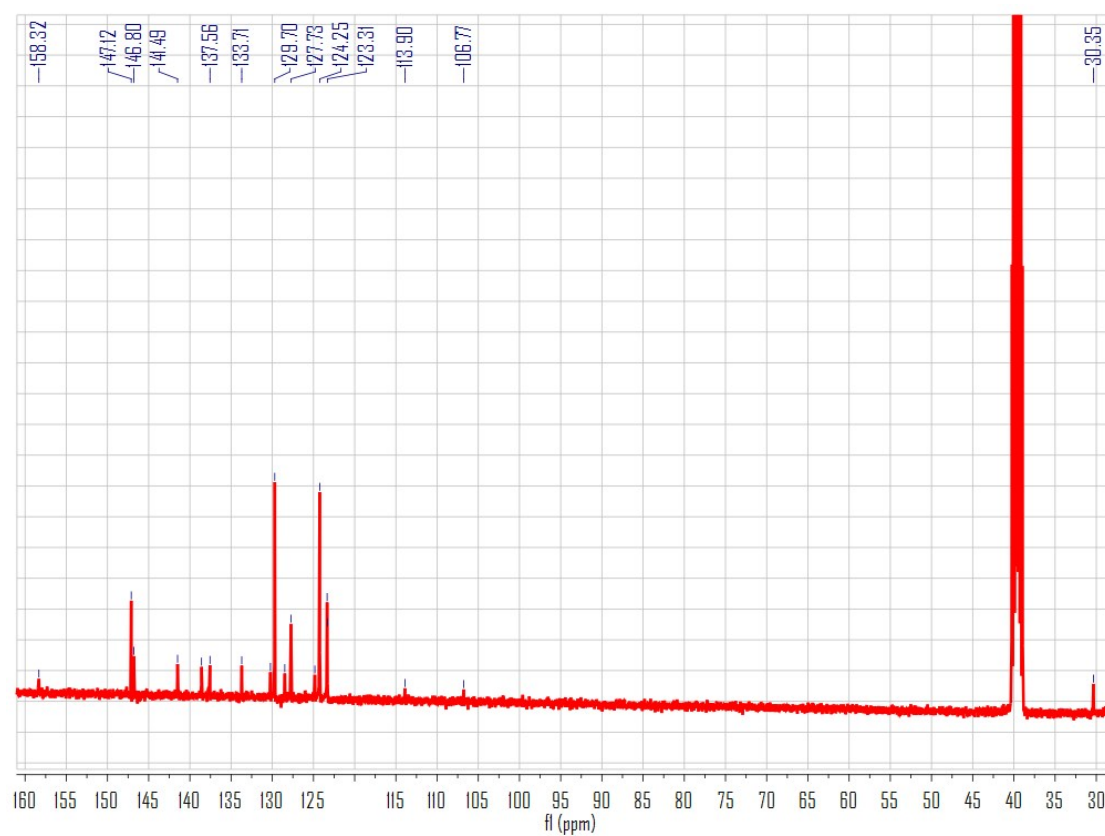

Fig. S2.  $^{13}\text{C}$  NMR spectrum of **D-PY** ( $\text{DMSO-}d_6$ ).

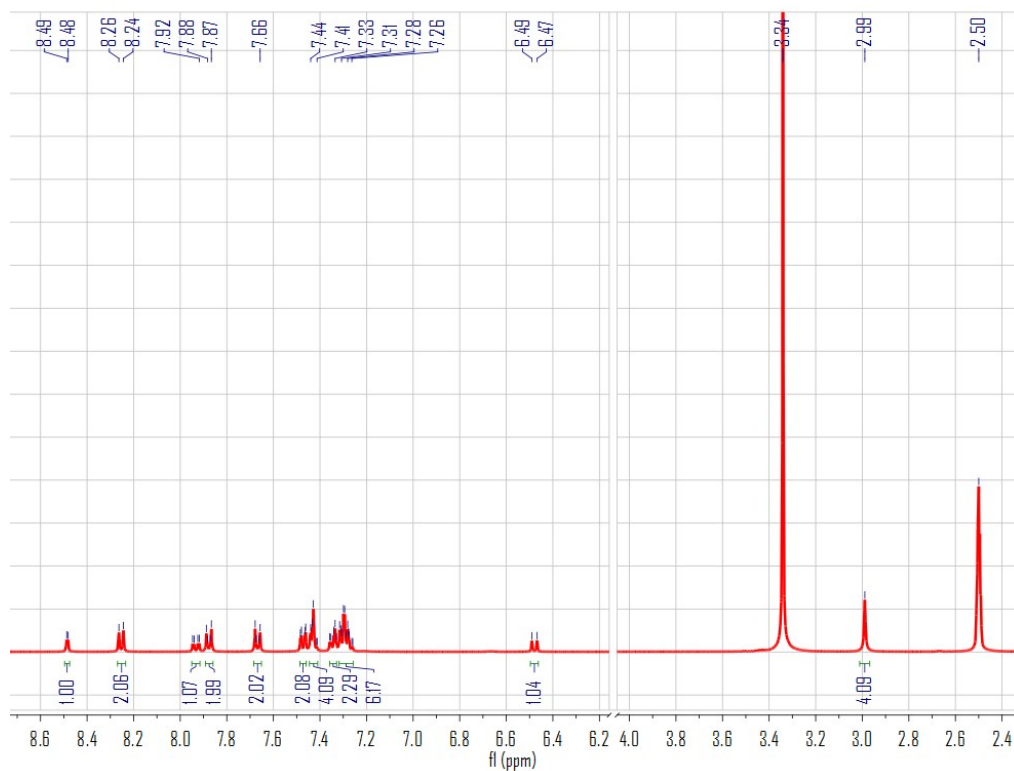

Fig. S3.  $^1\text{H}$  NMR spectrum of S-CZ (DMSO- $d_6$ ).

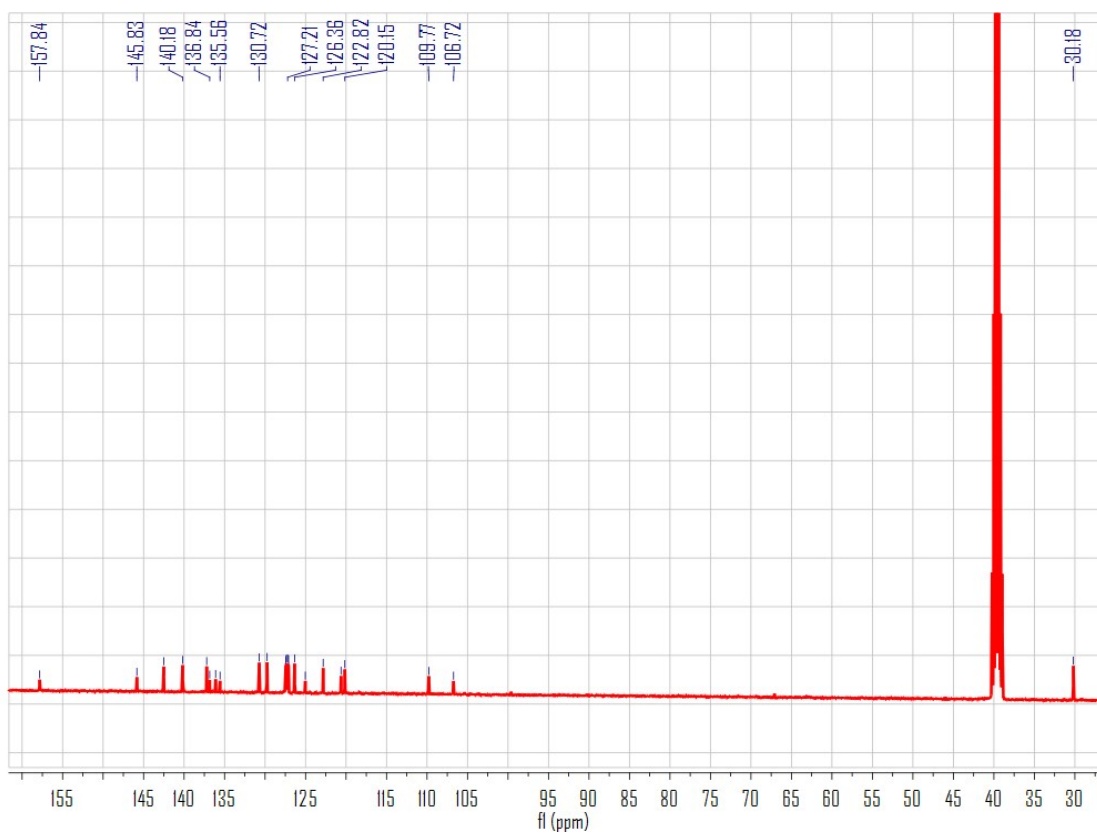

Fig. S4.  $^{13}\text{C}$  NMR spectrum of S-CZ (DMSO- $d_6$ ).

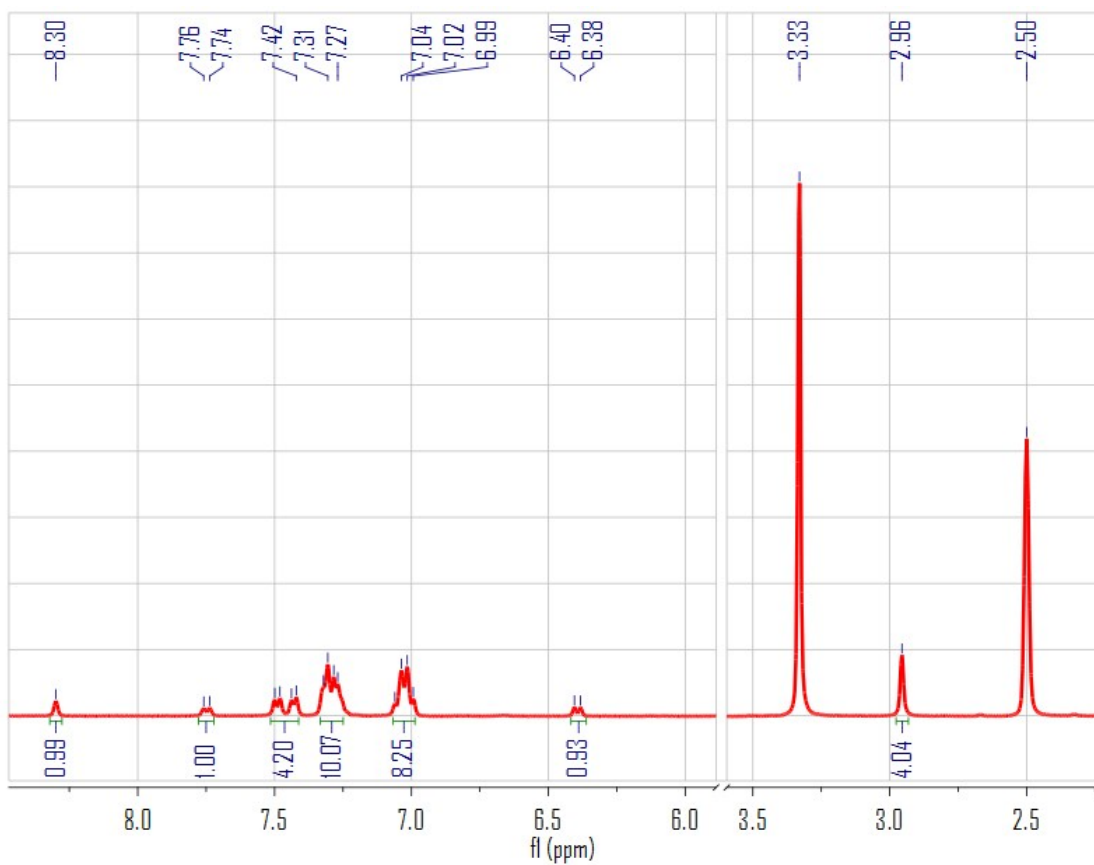

Fig. S5.  $^1\text{H}$  NMR spectrum of **S-TPA** ( $\text{DMSO-}d_6$ ).

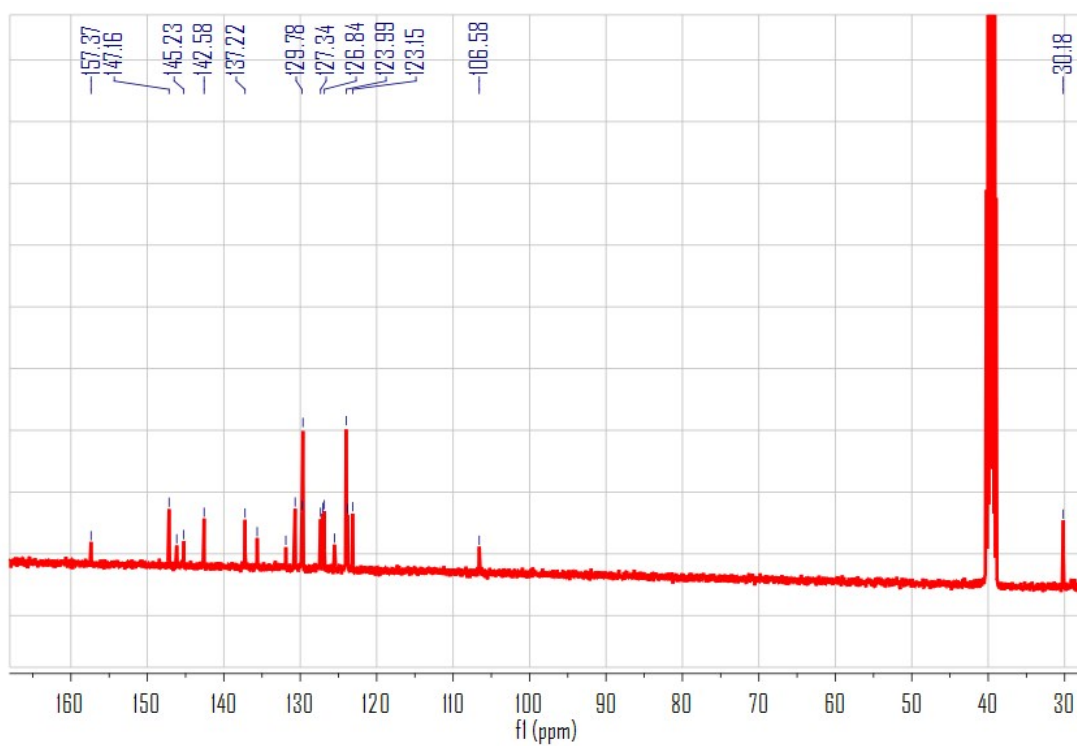

Fig. S6.  $^{13}\text{C}$  NMR spectrum of **S-TPA** ( $\text{DMSO-}d_6$ ).

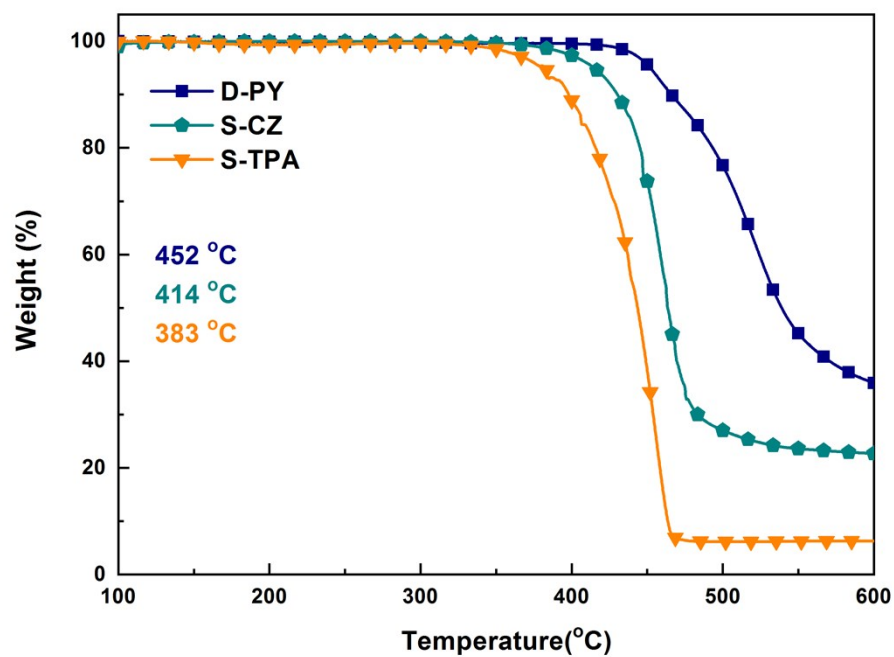

Fig. S7. Thermogravimetric analysis (TGA) curves of **D-PY**, **S-CZ**, and **S-TPA**.

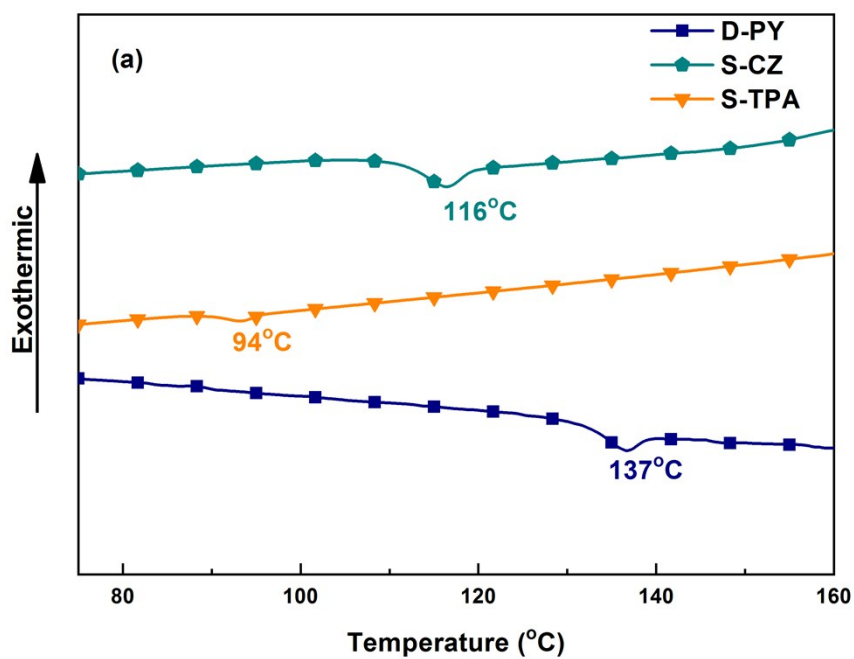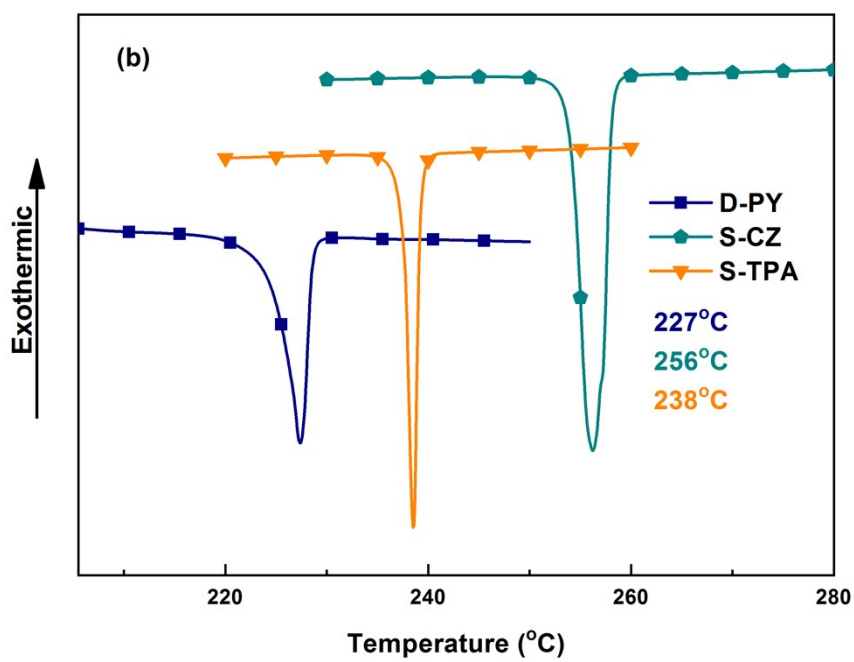

Fig. S8. Differential scanning calorimetry (DSC) curves of **D-PY**, **S-CZ**, and **S-TPA**.

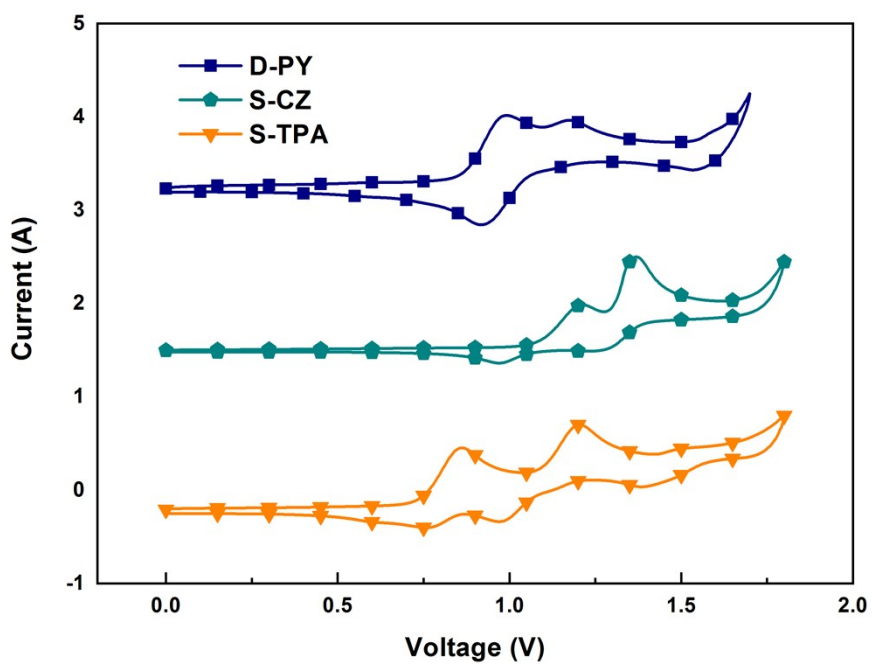

Fig. S9. Cyclic voltammogram curves of **D-PY**, **S-CZ**, and **S-TPA**.

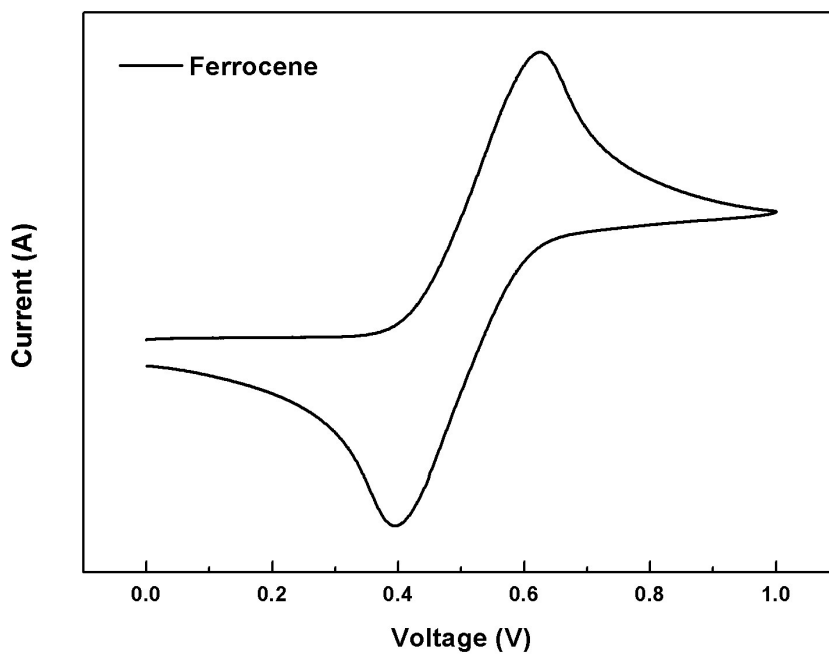

Fig. S10. Cyclic voltammogram curve of ferrocene.

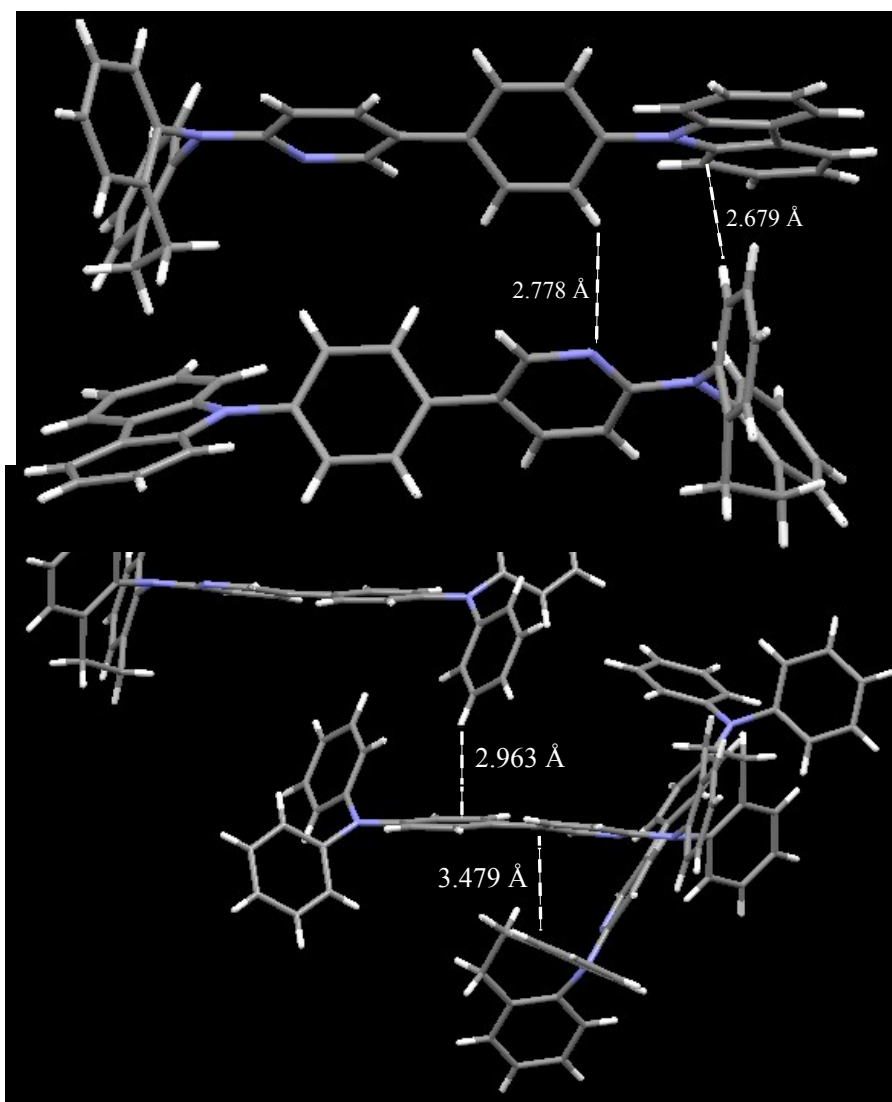

Fig. S11. Packing pattern of S-CZ, and S-TPA at solid state.



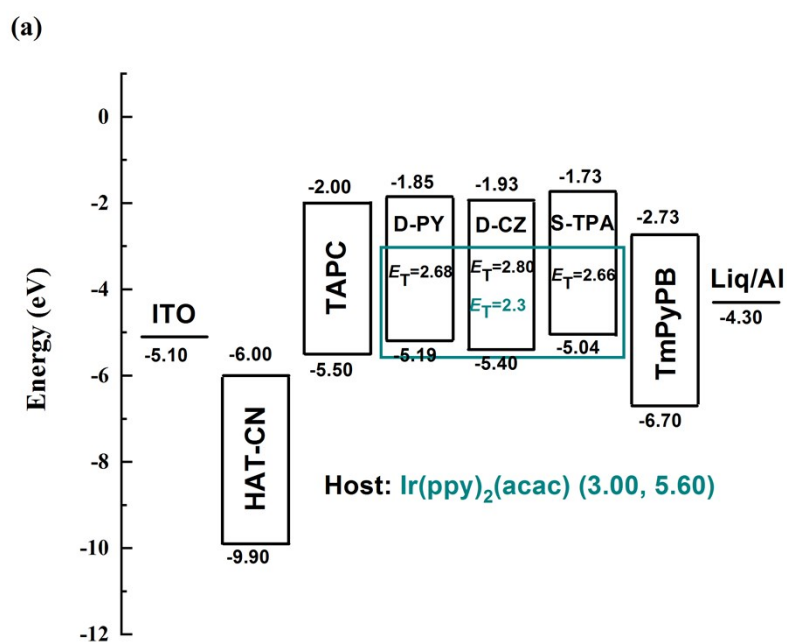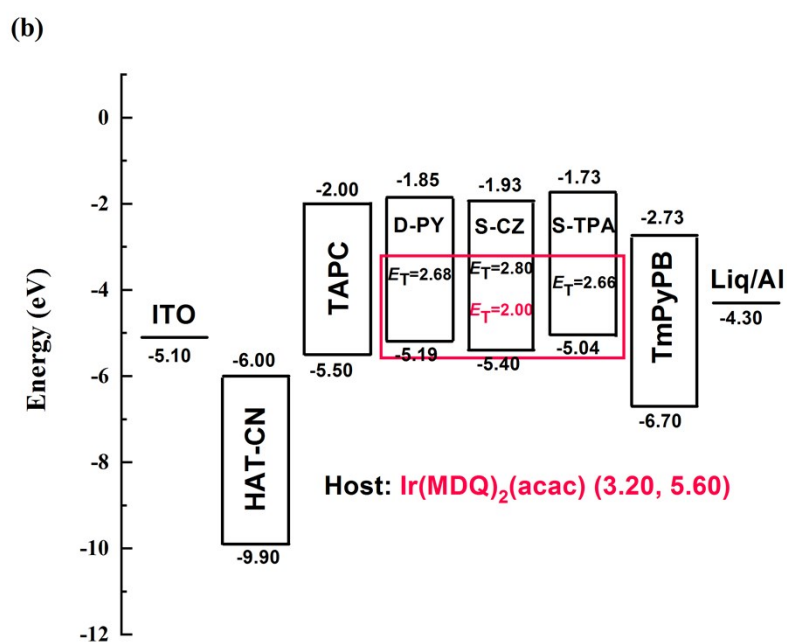

Fig. S12. Green (a), red (b) device structures and representative energy level diagram.

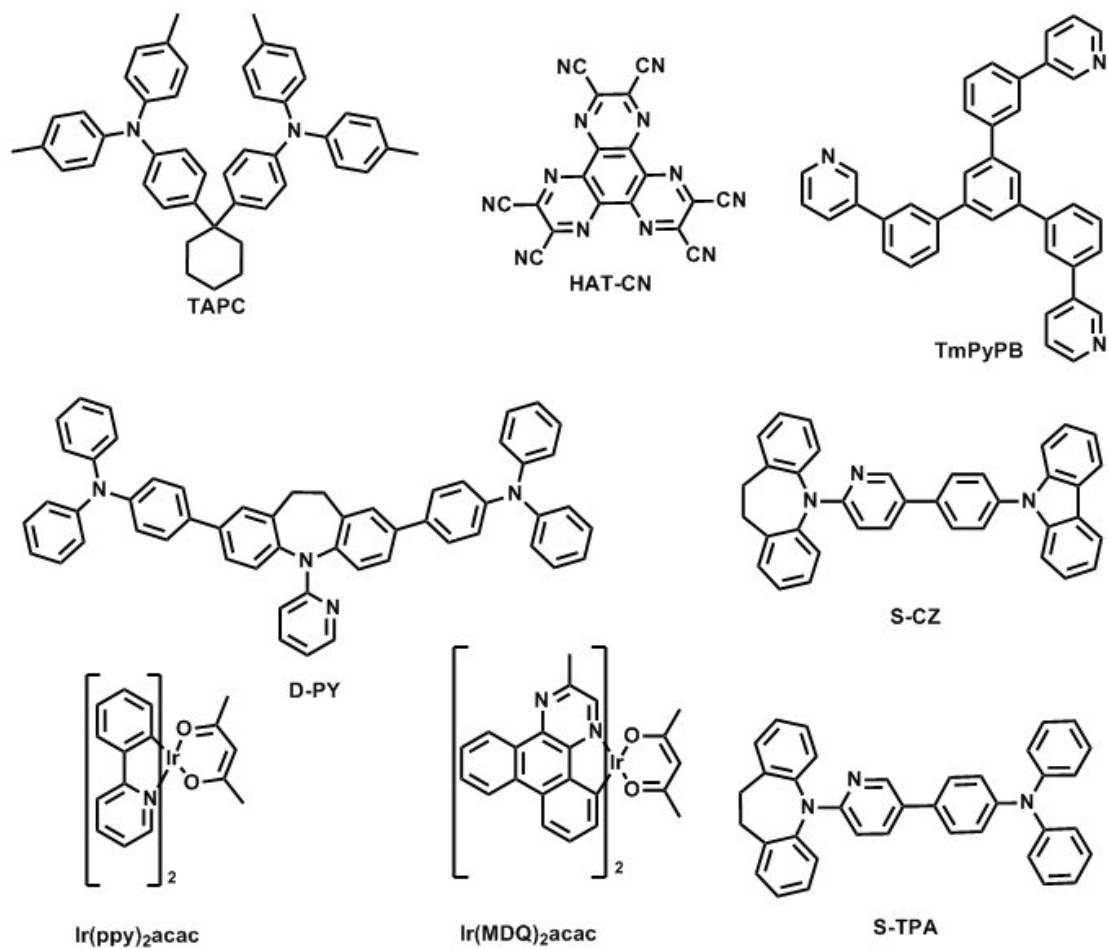

Fig. S13. Molecular structures of materials used in **D-PY**, **S-CZ**, and **S-TPA** based device.

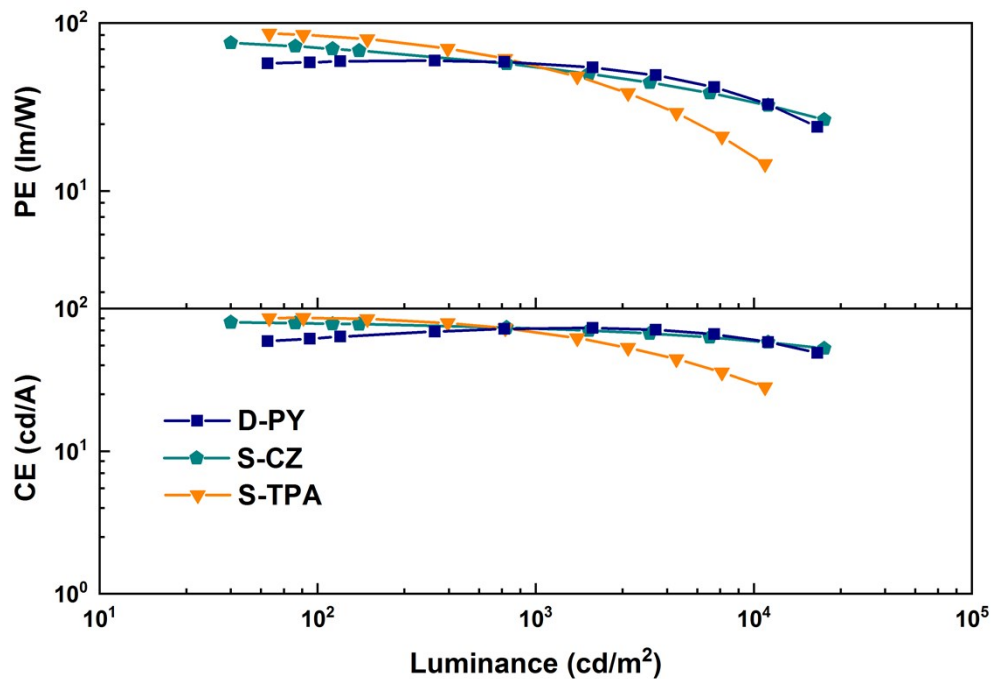

Fig. S14. CE-, and PE-*L* curves of Ir(ppy)<sub>2</sub>(acac)-doped PHOLEDs hosted by **D-PY**,**S-CZ** and **S-TPA**.

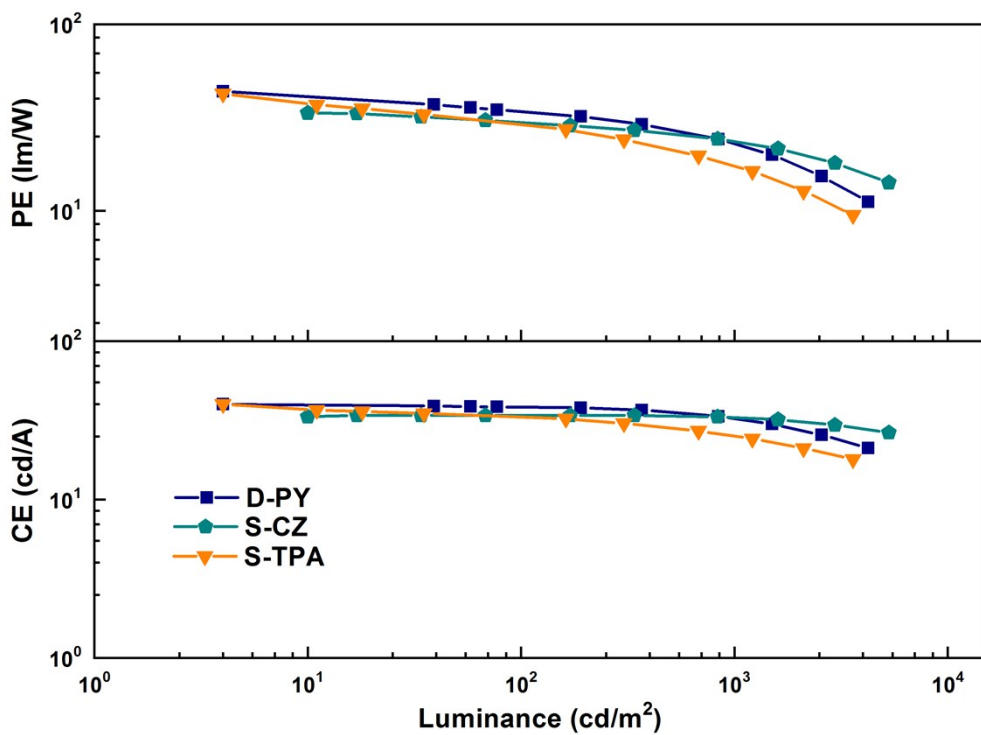

Fig. S15. CE-, and PE-*L* curves of Ir(MDQ)<sub>2</sub>(acac)-doped PHOLEDs hosted by **D-PY**,**S-CZ** and **S-TPA**.
